# Supplementary material for: HLA-DRα1-mMOG-35-55 treatment of experimental autoimmune encephalomyelitis reduces CNS inflammation, enhances M2 macrophage frequency, and promotes neuroprotection
Source: Springer Nature journal article supplement (doi:10.1186/s12974-015-0342-4), 2015-06-23
Supplement: MOESM1 [file 9768736]

**Supplementary figures.**

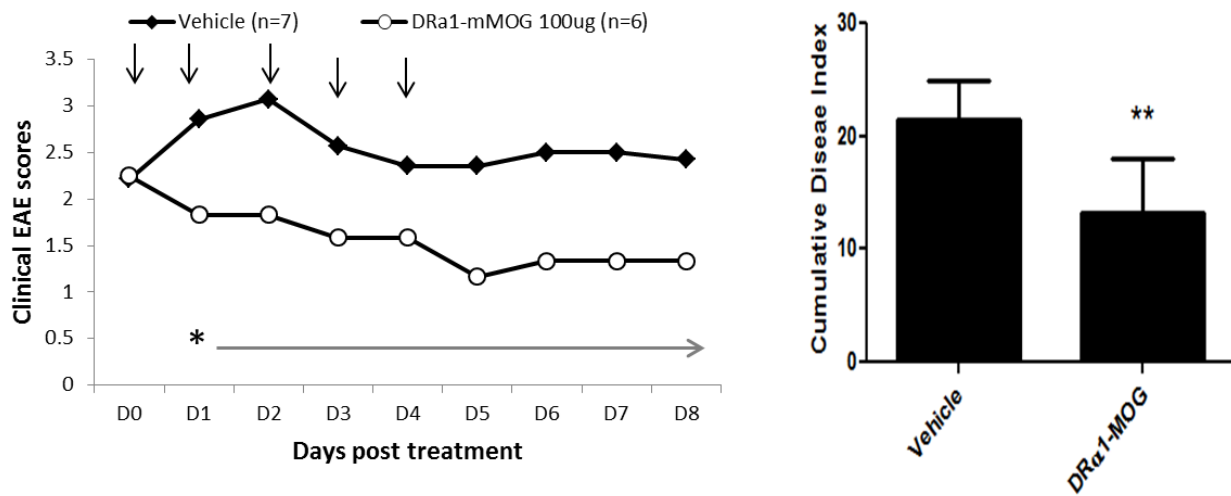

**Supplementary Figure 1. DRα1-mMOG-35-55 treats clinical EAE in DR\*1502-Tg mice.**

DR\*1502-Tg mice with human MOG-35-55-induced EAE were treated after disease onset at a clinical score of  $\geq 2$  with DRα1-mMOG-35-55 (100  $\mu$ g, daily x 5, black arrows) or Vehicle. Mean clinical EAE daily disease scores (left) and cumulative disease index scores (right) are shown. \* $p < 0.05$ , \*\* $p < 0.01$ . Daily mean scores were analyzed by Mann Whitney U and mean CDI by Student's t-test.

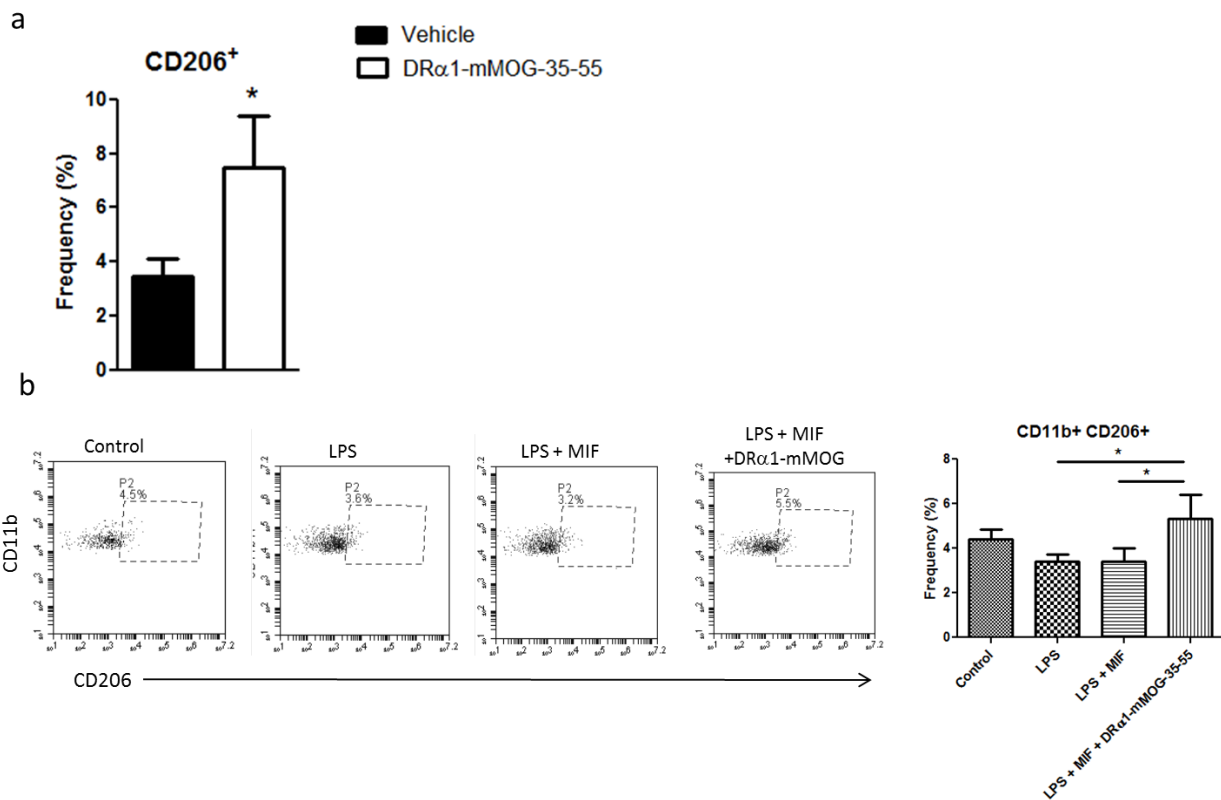

**Supplementary Figure 2. DRα1-mMOG-35-55 treatment increases the frequency of CD11b<sup>+</sup>CD206<sup>+</sup> in spinal cords of EAE mice.** (a) Frequency of CD206<sup>+</sup> on CD11b<sup>+</sup>CD45<sup>hi</sup> cells from spinal cords of DRα1-mMOG-35-55- (n=6) vs. Vehicle-treated (n=6) DR\*1501-Tg mice with EAE. (b) Splenocytes from naïve DR\*1501-Tg mice (n=4) were treated with 10ng/ml LPS, 100ng/ml recombinant MIF and 25μg/ml DRα1-mMOG-35-55 for 24 hr. Frequency of CD206<sup>+</sup> on CD11b<sup>+</sup>F4/80<sup>+</sup> cells was evaluated by flow cytometry. Data are presented as mean ± SD. \* p<0.05, (a) Student's t-test. (b) One way ANOVA with Tukey post-test.
